# Supplementary material
Source: PubMed Central journal article supplement (PMC3340039)
Supplement: 1117686109_pnas.1117686109_SI.pdf [file 1117686109_pnas.1117686109_SI.pdf]

# Supporting Information

McKee et al. 10.1073/pnas.1117686109

## Materials and Methods.

**Cloning, Expression, Mutagenesis, and Purification of HiAXHd3.** The gene encoding mature HiAXHd3 (residues 28 to 558) was synthesized by Blue Heron Biotechnology Inc., with codons optimized for *Escherichia coli*; the translational stop codon was deleted and the gene was flanked with NcoI and XhoI restriction sites. The gene was inserted into the *E. coli* expression vector pET21(a) at the NcoI and XhoI restriction sites to generate pLM1. HiAXHd3 was expressed in *E. coli* TUNER cells harboring pLM1; the recombinant bacterium was grown to midexponential phase ( $A_{600} = 0.6$ ) and expression of HiAXHd3 was induced with 0.2 mM isopropyl- $\beta$ -D-thiogalactopyranoside and incubated for 16 h at 16 °C. The *E. coli* derived HiAXHd3 construct contained a C-terminal His<sub>6</sub>-tag and was thus purified from the *E. coli* cell-free extracts to electrophoretic homogeneity by immobilized metal ion affinity chromatography (IMAC) purification essentially as described previously (1), except that His select HF Nickel Affinity gel matrix (Sigma Aldrich) was used instead of Talon Fast Flow. The enzyme was generally eluted with 100 mM imidazole. For structural studies the protein was further purified by size exclusion chromatography using a HiLoad 16/60 Superdex 200 gel filtration column (GE Healthcare) as described previously (1). Site-directed mutagenesis of *E. coli*-derived HiAXHd3 was carried out employing a PCR-based QuikChange site-directed mutagenesis kit (Stratagene) according to the manufacturer's instructions, using appropriate primers. Randomization of residues Gly183, Asn184, Tyr166, and Phe493 was achieved by carrying out four individual site-directed mutagenesis reactions in which the codon for the respective target amino acid was randomized. The four libraries (approximately 200 colonies per library) were screened for increased xylanase activity (compared to the Y166A variant) using a Blue-xylan overlay as described previously (2), except that the colony-containing agar plates were not preheated but overlaid with Blue-xylan agar and incubated at 37 °C for 8 h.

**Data Collection and Structure Solution of HiAXHd3.** A seleno-methionine derivative of HiAXHd3 (Se-Met HiAXHd3), prepared as described in ref. 1, was crystallized at 20 mg/mL in 0.1 M Bistris (pH 6.5), 22% (wt/vol) PEG 3350, and 2 M ammonium sulfate. The D43A variant of the protein crystallized at 10 mg/mL in 0.1 M Na-Hepes (pH 7.5), 22.5% (wt/vol) PEG 4000, and 0.1 M NaCl and subsequently soaked with 20 mM ligand (Araf-Xylp3) for 2 h, while the Y166A/E216A mutant, also at 10 mg/mL, was crystallized in 0.1 M Bistris propane (pH 8.5), 20% (wt/vol) PEG 3500, and 0.2 M sodium fluoride. Crystals of HiAXHd3 were cryoprotected using the reservoir solution supplemented with 20% (wt/vol) glycerol. Data for the Se-Met protein were collected on beam line I04 at Diamond Light Source, whereas data for the other proteins were collected at

the Advanced Photon Source on beam line 22-ID or 22-BM. The diffraction images were integrated using iMosfilm, and the results were scaled and merged using SCALA (3). The space group was determined to be P2<sub>1</sub>. Selenium positions and phases were determined using the SHELXC/D/E pipeline [recently reviewed (4)]. The resulting phases were used in model building using the Collaborative Computational Project No. 4 implementation of REFMAC/ARP-wARP (5). Minor manual corrections were performed using the program COOT (6) interspersed with cycles of maximum likelihood refinement using REFMAC (5) and PHENIX Refine (7). The structure of the HiAXHd3 mutants D43A in complex with ligands, and apo Y166A/E216A, were determined by molecular replacement using Phaser (8) with the Se-Met form of wild-type HiAXHd3 as the search model. Final data and structure quality statistics for these proteins are given in Table S2, which also provides the Protein Data Bank codes.

**Generation of Ligands for Structural and Biochemical Studies.** To generate the arabinooligosaccharides used in the experiment described in Fig. S2 sugar beet arabinan (Megazyme) was added to 0.5 M HCl to a final concentration of 20 mg/mL. The mixture was heated to 100 °C for 10 min, followed by 20 min at room temperature. To neutralize the solution, sodium hydroxide (NaOH) was added to a final molarity matching that of the acid. Samples were then analyzed by high performance anion exchange chromatography (HPAEC) and fractions where 25% of the glycosidic bonds were hydrolyzed were retained for further use. Unhydrolyzed arabinan was removed from these samples by ethanol precipitation using two to three volumes of the alcohol and incubation at 4 °C for 2–16 h. The soluble arabinooligosaccharide fraction was then lyophilized and resuspended in a small volume of deuterium oxide.

To generate oligosaccharide substrates for structural studies arabinoxylan (1 g) was dissolved in 40 mL of 50 mM sodium phosphate buffer (pH 7.0) to which was added 2 mL BSA (1 mg mL<sup>-1</sup> final) and the GH10 xylanase CjXyn10A to a final concentration of 50 nM final. The reaction was incubated for 1 h. The digested products were separated by size exclusion chromatography using P2 Biogel (BioRad) matrix packed in a Glass Econo-Column (2.5 cm × 80 cm, total volume 500 mL, BioRad). The column was equilibrated with three column volumes of water and the mixture of xyloarabinooligosaccharides generated by enzyme treatment were lyophilized, resuspended in 2 mL of water, and loaded onto the column. The column was run by gravity flow and 1 mL fractions were collected after the void volume. Aliquots of the fractions were subjected to HPAEC before and after treated with HiAXHd3 to identify those that contain substrates for the enzyme. Fractions with the simplest oligosaccharide profile were freeze dried and used in crystal soaking experiments.

1. Charnock SJ, et al. (2000) The X6 "thermostabilizing" domains of xylanases are carbohydrate-binding modules: structure and biochemistry of the *Clostridium thermocellum* X6b domain. *Biochemistry* 39:5013–5021.
2. Andrews SR, et al. (2004) The use of forced protein evolution to investigate and improve stability of family 10 xylanases. The production of Ca<sup>2+</sup>-independent stable xylanases. *J Biol Chem* 279:54369–54379.
3. Evans P (2006) Scaling and assessment of data quality. *Acta Crystallogr D* 62:72–82.
4. Sheldrick GM (2008) A short history of SHELX. *Acta Crystallogr A* 64:112–122.

5. Murshudov GN, Vagin AA, Dodson EJ (1997) Refinement of macromolecular structures by the maximum-likelihood method. *Acta Crystallogr D* 53:240–255.
6. Emsley P, Cowtan K (2004) Coot: Model-building tools for molecular graphics. *Acta Crystallogr D* 60:2126–2132.
7. Adams PD, et al. (2010) PHENIX: A comprehensive Python-based system for macromolecular structure solution. *Acta Crystallogr D* 66:213–221.
8. McCoy AJ (2007) Solving structures of protein complexes by molecular replacement with Phaser. *Acta Crystallogr D* 63:32–41.



**A**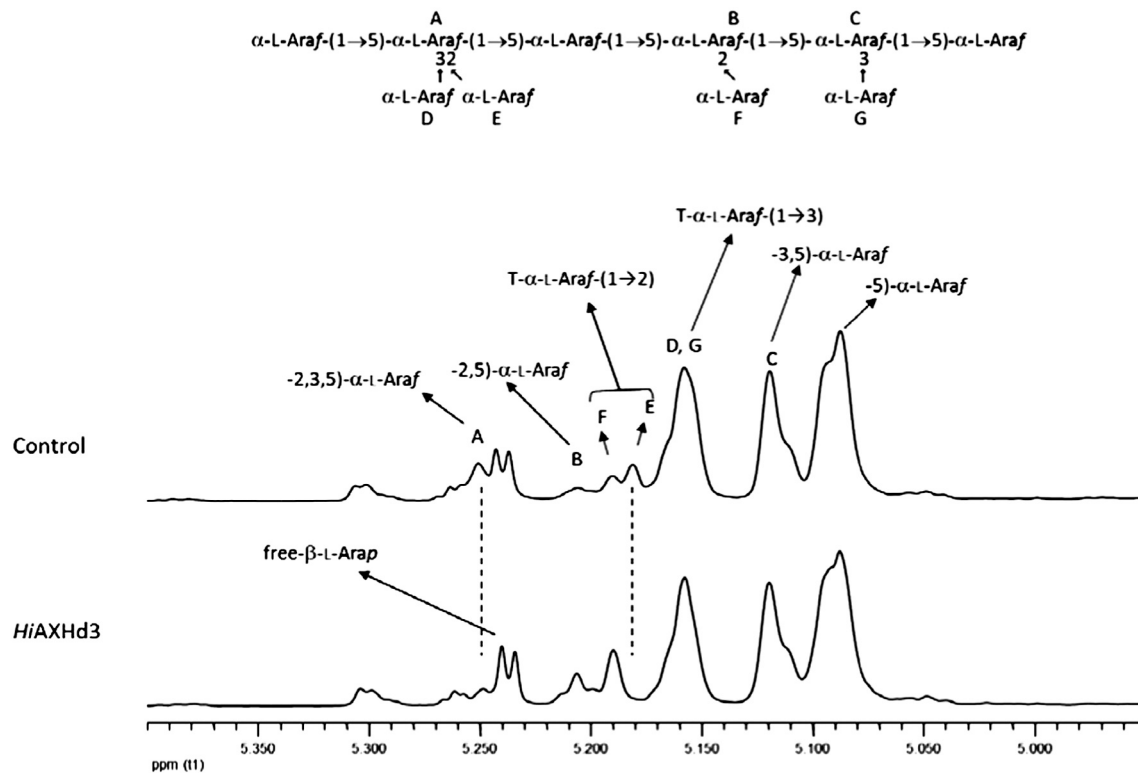**B**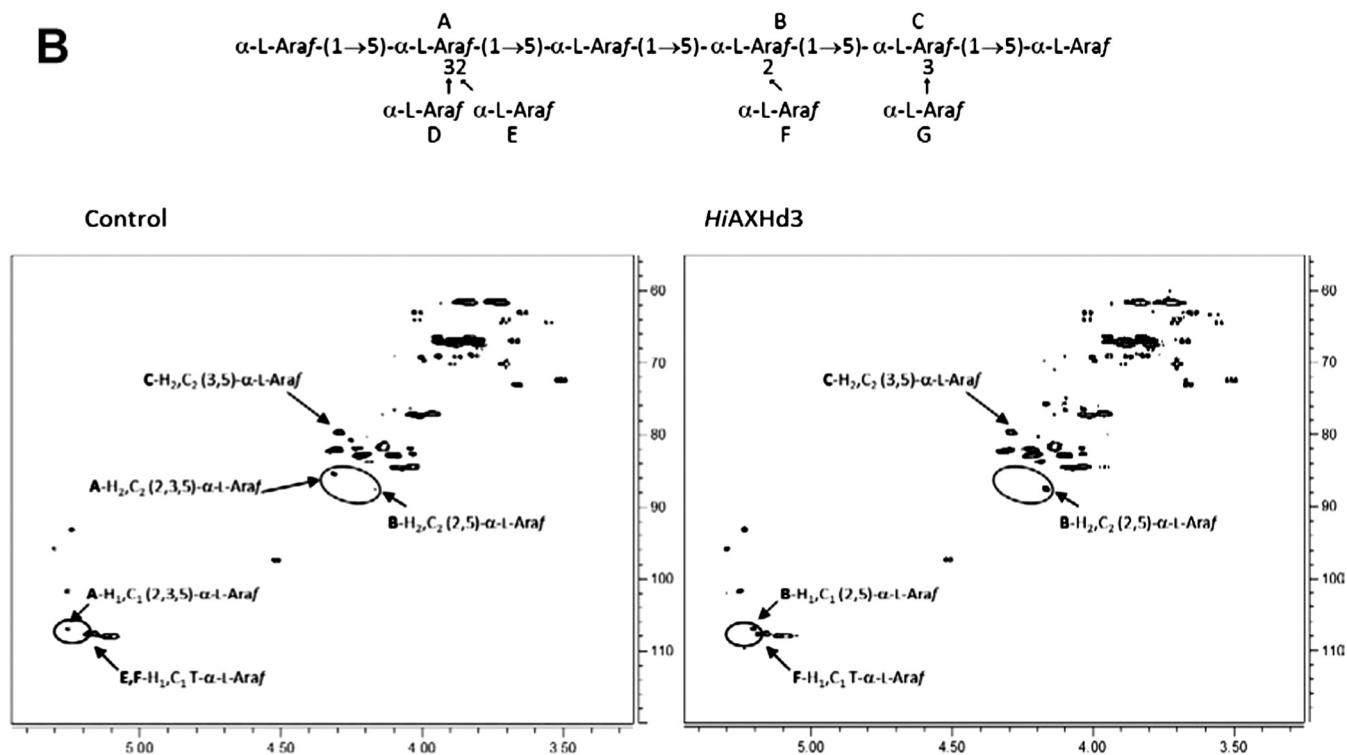

**Fig. S2.** NMR analysis of enzyme treated arabinan. (A) displays partial  $^1\text{H-NMR}$  spectra of sugar beet arabinan-derived oligosaccharides incubated without (control) and with *HiAXHd3* (100 nM) for 90 min. The letters in the spectra correspond to residues in the structures in the top of both A and B. The structures show the types of substitutions present in the substrates. (B) Shows 2D NMR (gHSQC) of the two samples. The disappearance of A and the increase in B shows that *HiAXHd3* attacks the O3-linked Araf in double substitutions (at O2 and O3) in arabinan.

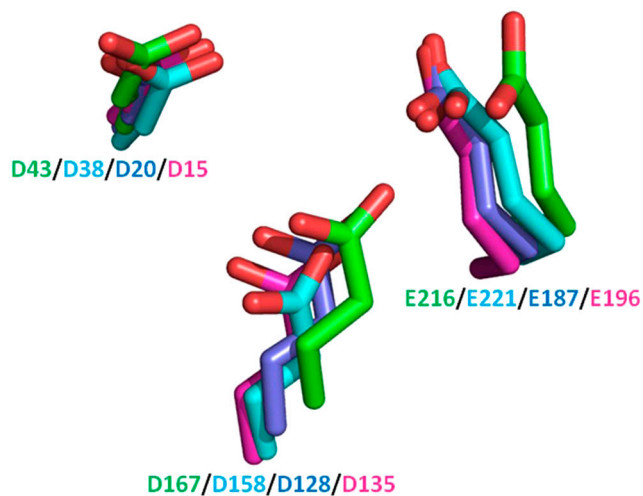

**Fig. S3.** Conservation of the catalytic residues with GH43. The catalytic residues, shown in stick format, of *HiAXHd3* (carbon atoms shown in green) are overlaid with the  $\beta$ -D-xylosidase *XynB3* [Protein Data Bank (PDB), 2EXK; carbons in pink], the  $\alpha$ -L-arabinofuranosidase *SaAraf43A* (PDB, 3AKG; carbons in slate blue), and the arabinanase *CjArb43A* (PDB, 1GYD; carbons in cyan). The catalytic base, catalytic acid, and pKa modulator of the catalytic acid in *HiAXHd3* are D43, E216, and D167, respectively.

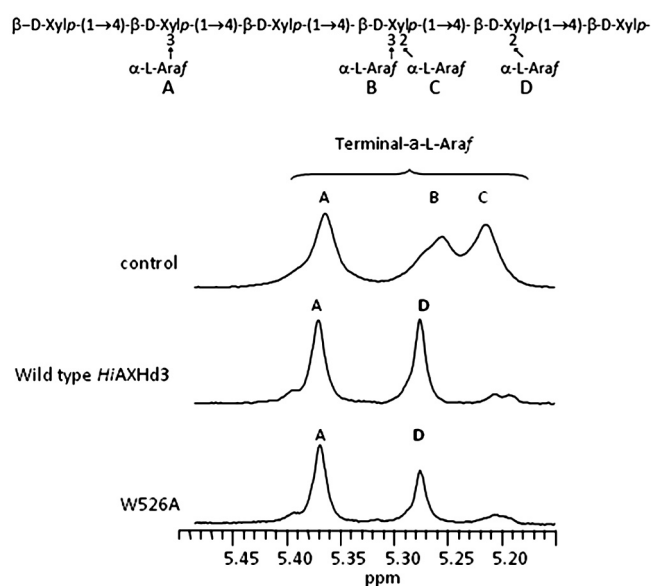

**Fig. S4.** 1D NMR of *HiAXHd3* wild type and W526A variant wheat arabinoxylan reaction products. In the schematic, linkages within the polysaccharide (A–D) are labeled to correspond with peaks in the NMR spectra. The control spectrum is arabinoxylan that has not been subjected to enzymatic digestion. In the spectrum of wheat arabinoxylan incubated with wild-type *HiAXHd3* (or the Y166A mutant) peaks A and D are roughly equal in size (ratio 1:0.84), because cleavage of the double substitution has generated single O2 substitutions that are almost as numerous as the preexisting single O3 substitution. In the spectra of wheat arabinoxylan incubated with the W526A mutant of *HiAXHd3* the same profile is observed but the ratio of peak size for A and D is 1:0.47. This indicates that cleavage of the double substitution by the mutant has similar quantities of additional single O3 and O2 substitutions in the arabinoxylan polysaccharide.



**Table S1. The catalytic activity of wild type and variants of HiAXHd3**

|                   | Wheat arabinoxylan             |                               |                                                    | Sugar beet arabinan            |                               |                                                    |
|-------------------|--------------------------------|-------------------------------|----------------------------------------------------|--------------------------------|-------------------------------|----------------------------------------------------|
|                   | $k_{cat}$ (min <sup>-1</sup> ) | $K_M$ (M)                     | $k_{cat}/K_M$ (min <sup>-1</sup> M <sup>-1</sup> ) | $k_{cat}$ (min <sup>-1</sup> ) | $K_M$ (M)                     | $k_{cat}/K_M$ (min <sup>-1</sup> M <sup>-1</sup> ) |
| Wild type         | $1.0(\pm 0.13) \times 10^4$    | $3.5(\pm 1.4) \times 10^{-4}$ | $3.0 \times 10^7$                                  | $1.7(\pm 0.1) \times 10^3$     | $1.3(\pm 0.3) \times 10^{-4}$ | $1.4 \times 10^7$                                  |
| D43A              |                                | Inactive                      |                                                    |                                | Inactive                      |                                                    |
| D167A             |                                | Inactive                      |                                                    |                                | Inactive                      |                                                    |
| E216A             |                                | Inactive                      |                                                    |                                | Inactive                      |                                                    |
| H272A             | $11.0 \pm 2.35$                | $3.9(\pm 2.7) \times 10^{-4}$ | $2.9 \times 10^4$                                  | $3.2 \pm 1.0$                  | $2.8(\pm 0.3) \times 10^{-4}$ | $1.2 \times 10^4$                                  |
| F289A             | $25.7 \pm 2.7$                 | $2.0(\pm 0.7) \times 10^{-4}$ | $1.3 \times 10^5$                                  | $15.5 \pm 2.4$                 | $1.1(\pm 0.8) \times 10^{-4}$ | $1.4 \times 10^5$                                  |
| T232A             | $17.7 \pm 2.8$                 | $8.1(\pm 5.3) \times 10^{-5}$ | $2.2 \times 10^5$                                  | $4.7 \pm 1.1$                  | $2.3(\pm 0.4) \times 10^{-5}$ | $2.0 \times 10^5$                                  |
| T232A/H272A/F289A |                                | Inactive                      |                                                    |                                | Inactive                      |                                                    |
| S58A              | $7.1(\pm 1.4) \times 10^2$     | $2.6(\pm 2.0) \times 10^{-4}$ | $2.7 \times 10^6$                                  | $75.8 \pm 6.4$                 | $3.1 \pm 1.2 \times 10^{-5}$  | $2.5 \times 10^6$                                  |
| R297A             |                                | Inactive                      |                                                    |                                | Inactive                      |                                                    |
| Q273A             |                                | Inactive                      |                                                    |                                | Inactive                      |                                                    |
| D291A             |                                | Inactive                      |                                                    |                                | Inactive                      |                                                    |
| W108A             |                                | Inactive                      |                                                    |                                | Inactive                      |                                                    |
| W526A             | $25.4 \pm 6.6$                 | $1.9(\pm 1.7) \times 10^{-4}$ | $1.4 \times 10^5$                                  | $40.4 \pm 4.8$                 | $1.2(\pm 0.4) \times 10^{-3}$ | $3.4 \times 10^4$                                  |
| Y166F             | n.d.                           | n.d.                          | $2.9(\pm 0.9) \times 10^3$                         |                                | Inactive                      |                                                    |
| Y166W             | $16.6 \pm 2.5$                 | $1.5(\pm 0.4) \times 10^{-5}$ | $1.1 \times 10^6$                                  | n.d.                           | n.d.                          | $2.1(\pm 0.4) \times 10^3$                         |

n.d., not determined.

**Table S2. Crystallographic data and refinement statistics**

| HiAraF                       | Wildtype Se-Met        | D43A/Araf-Xylp <sub>3</sub> | Y166A/E216A           |
|------------------------------|------------------------|-----------------------------|-----------------------|
| <i>Data collection</i>       |                        |                             |                       |
| Space group                  | P2 <sub>1</sub>        | P2 <sub>1</sub>             | P2 <sub>1</sub>       |
| Wavelength (Å)               | 0.9795                 | 1.0000                      | 1.0000                |
| Unit cell (Å)                | 95.32 78.26 95.77      | 65.38 52.97 146.87          | 65.31 83.93 97.89     |
|                              | $\beta = 103.13$       | 101.69                      | 102.81                |
| Resolution (Å)               | 47.75-1.85 (1.90-1.85) | 33.68-1.44(1.47-1.44)       | 1.87-48.27(1.89-1.87) |
| No. observations             | 820,508 (100,003)      | 426,983 (61,153)            | 443,472 (75,433)      |
| unique                       | 80,563 (11,718)        | 177,611 (25,617)            | 89,446 (13,300)       |
| Multiplicity                 | 10.2 (8.5)             | 2.4 (2.4)                   | 4.8 (4.2)             |
| Anomalous multiplicity       | 5.1 (4.3)              | N/A                         | N/A                   |
| completeness                 | 100 (100)              | 99.2 (98.3)                 | 99.7 (99.3)           |
| anomalous completeness       | 99.4 (100)             | N/A                         | N/A                   |
| Average I/sigma I            | 13.8 (5.1)             | 16.2 (9.8)                  | 14.7 (8.6)            |
| R <sub>sym</sub>             | 0.121 (0.463)          | 0.084 (0.172)               | 0.097 (0.186)         |
| <i>Refinement</i>            |                        |                             |                       |
| Number of reflections        | 76,187                 | 167,521                     | 82,744                |
| R <sub>cryst</sub> (%)       | 15.13                  | 16.67                       | 14.16                 |
| R <sub>free</sub> (%)        | 18.47                  | 20.81                       | 18.70                 |
| No. of protein atoms         | 8,406                  | 8,382                       | 8,414                 |
| No. of solvent atoms         | 847                    | 1,081                       | 1,108                 |
| No. of ligand atoms          | N/A                    | 74                          | N/A                   |
| <i>rmsd</i>                  |                        |                             |                       |
| Bond lengths (Å)             | 0.011                  | 0.012                       | 0.017                 |
| Bond angles (°)              | 1.290                  | 1.408                       | 1.555                 |
| <i>Ramachandran</i>          |                        |                             |                       |
| Favored (%)                  | 96.21                  | 96.11                       | 95.7                  |
| Allowed (%)                  | 4.79                   | 3.89                        | 4.00                  |
| Disallowed (%)               | 0.00                   | 0.00                        | 0.30                  |
| <i>B-factors</i>             |                        |                             |                       |
| Wilson B (Å <sup>2</sup> )   | 16.09                  | 8.08                        | 15.9                  |
| Main chain (Å <sup>2</sup> ) | 16.52                  | 9.36                        | 16.26                 |
| Side chain (Å <sup>2</sup> ) | 19.65                  | 10.59                       | 22.10                 |
| Water (Å <sup>2</sup> )      | 17.77                  | 25.35                       | 30.38                 |
| Ligand (Å <sup>2</sup> )     | N/A                    | 25.30                       | N/A                   |
| <i>PDB codes</i>             |                        |                             |                       |
|                              | 3ZXJ                   | 3ZXX                        | 3ZXL                  |

PDB, Protein Data Bank.
